# Supplementary material
Source: MDPI journal article supplement (https://www.mdpi.com/2073-4395/11/12/2392)
Supplement: s1 [file s1]

# **Supplementary Information**

## **Title Page**

### **Elevated Fe and Mn concentrations in groundwater in the Songnen Plain, Northeast China, and the factors and mechanisms involved**

Yuanzheng Zhai<sup>1</sup>, Xinyi Cao<sup>1</sup>, Xuelian Xia<sup>1</sup>, Bin Wang<sup>1</sup>, Yanguo Teng<sup>1,\*</sup>, Xiao Li<sup>2,\*</sup>

1 Engineering Research Center for Groundwater Pollution Control, Remediation of Ministry of Education of China, College of Water Sciences, Beijing Normal University, Beijing 100875, China

2 Shenyang Institute of Geology and Mineral Resources, CGS, Shenyang 110034, China

#### **Corresponding authors:**

1 Yanguo Teng at Beijing Normal University, Beijing 100875, China. E-mail: teng1974@163.com; phone: +86 010-58802738

2 Xiao Li at Shenyang Institute of Geology and Mineral Resources, CGS, Shenyang 110034, China. E-mail: ZZLX19@163.com; phone: +86 024-81847057

### **Table captions**

**Table S1.** Methods for determining water quality indicators and the corresponding detection limits.

**Table S2.** Data sources used in the study.

**Table S3.** Statistical data for the Fe and Mn concentrations in the groundwater samples.

**Table S4.** Summary of the Fe and Mn concentrations in the groundwater samples. grouped by the influencing factors.



**Table S1.** Methods for determining water quality indicators and the corresponding detection limits.

| Test indicator                | Unit | Test site | Test method                                              | Detection limit |
|-------------------------------|------|-----------|----------------------------------------------------------|-----------------|
| pH                            | —    | Field     | Portable multi-parameter rapid water quality analyzer    | —               |
| TDS                           |      |           | (HANNA-HI9828)                                           | 1               |
| TH                            |      |           | EDTA titration method                                    | 1               |
| K                             |      |           |                                                          | 0.07            |
| Ca                            |      |           |                                                          | 0.03            |
| Na                            |      |           |                                                          | 0.02            |
| Mg                            |      |           | Inductively coupled plasma optical emission spectrometry | 0.02            |
| Fe                            |      |           |                                                          | 0.004           |
| Mn                            |      |           |                                                          | 0.0005          |
| As                            | mg/L | Lab       |                                                          | 0.001           |
| TP                            |      |           | Ammonium molybdate spectrophotometry                     | 0.01            |
| HCO <sub>3</sub> <sup>-</sup> |      |           | Neutralization titration method                          | 5               |
| COD <sub>Mn</sub>             |      |           | Acidic permanganate method                               | 0.5             |
| Cl <sup>-</sup>               |      |           |                                                          | 0.007           |
| SO <sub>4</sub> <sup>2-</sup> |      |           |                                                          | 0.046           |
| NH <sub>4</sub> <sup>+</sup>  |      |           | Ion Chromatography                                       | 0.025           |
| NO <sub>3</sub> <sup>-</sup>  |      |           |                                                          | 0.016           |
| NO <sub>2</sub> <sup>-</sup>  |      |           |                                                          | 0.016           |

TDS: total dissolved solids; TH: total hardness (calculated as CaCO<sub>3</sub>); TP: total phosphorus.

**Table S2.** Data sources used in the study.

| Variables                                  | Data sources                                                                      | Organization            |
|--------------------------------------------|-----------------------------------------------------------------------------------|-------------------------|
| Map of annual meteorological precipitation | <a href="https://www.resdc.cn/Default.aspx">https://www.resdc.cn/Default.aspx</a> | Resource and            |
| Map of average meteorological temperature  |                                                                                   | Environment Science and |
| Map of soil types                          |                                                                                   | Data Center             |
| Map land use types                         |                                                                                   |                         |

**Table S3.** Statistical data for the Fe and Mn concentrations in the groundwater.

|    | Number<br>of samples | Number of<br>samples with<br>elevated Fe/Mn | Percentage of                     |               |                  |               |                | Standard<br>Deviation |
|----|----------------------|---------------------------------------------|-----------------------------------|---------------|------------------|---------------|----------------|-----------------------|
|    |                      |                                             | samples with<br>elevated<br>Fe/Mn | Min<br>(mg/L) | Median<br>(mg/L) | Max<br>(mg/L) | Mean<br>(mg/L) |                       |
| Fe | 1332                 | 697                                         | 52.3%                             | <DL           | 0.340            | 48.930        | 1.873          | 4.71                  |
| Mn | 1332                 | 776                                         | 58.3%                             | <DL           | 0.1800           | 10.4600       | 0.4976         | 0.86                  |

samples

DL: detection limit.

**Table S4.** Summary of the Fe and Mn concentrations in the groundwater samples grouped by the influencing factors.

| Influencing factors                      |           | Fe (mg/L)         |                               |                                   |     |        |        | Mn (mg/L)         |                               |                                   |     |        |         |
|------------------------------------------|-----------|-------------------|-------------------------------|-----------------------------------|-----|--------|--------|-------------------|-------------------------------|-----------------------------------|-----|--------|---------|
|                                          |           | Number of samples | Number of samples with Fe>0.3 | Percentage of samples with Fe>0.3 | Min | Median | Max    | Number of samples | Number of samples with Mn>0.1 | Percentage of samples with Mn>0.1 | Min | Median | Max     |
| Annual meteoric precipitation (mm)       | (300,400] | 99                | 39                            | 39.4%                             | <DL | 0.190  | 48.930 | 99                | 43                            | 43.4%                             | <DL | 0.0800 | 4.1300  |
|                                          | (400,500] | 516               | 284                           | 55.0%                             | <DL | 0.390  | 47.980 | 516               | 336                           | 65.1%                             | <DL | 0.2100 | 8.1130  |
|                                          | (500,600] | 678               | 349                           | 51.5%                             | <DL | 0.323  | 48.760 | 678               | 374                           | 55.2%                             | <DL | 0.1579 | 10.4600 |
|                                          | (600,700] | 39                | 25                            | 64.1%                             | <DL | 0.574  | 9.530  | 39                | 23                            | 59.0%                             | <DL | 0.2478 | 2.3990  |
| Annual average meteoric temperature (°C) | (1,3]     | 75                | 25                            | 33.3%                             | <DL | 0.117  | 18.540 | 75                | 29                            | 38.7%                             | <DL | 0.0410 | 1.9730  |
|                                          | (3,5]     | 304               | 149                           | 49.0%                             | <DL | 0.267  | 41.700 | 304               | 151                           | 49.7%                             | <DL | 0.0924 | 10.4600 |
|                                          | (5,6]     | 471               | 280                           | 59.4%                             | <DL | 0.510  | 48.760 | 471               | 313                           | 66.5%                             | <DL | 0.3160 | 8.1130  |
|                                          | (6,7]     | 482               | 243                           | 50.4%                             | <DL | 0.310  | 48.930 | 482               | 283                           | 58.7%                             | <DL | 0.1604 | 8.0150  |
| Altitude (m)                             | (0,140]   | 250               | 201                           | 80.4%                             | <DL | 1.360  | 48.930 | 250               | 205                           | 82.0%                             | <DL | 0.3555 | 7.8400  |
|                                          | (140,160] | 414               | 231                           | 55.8%                             | <DL | 0.412  | 43.310 | 414               | 288                           | 69.6%                             | <DL | 0.2516 | 10.4600 |
|                                          | (160,180] | 224               | 103                           | 46.0%                             | <DL | 0.255  | 14.260 | 224               | 122                           | 54.5%                             | <DL | 0.1950 | 8.0150  |
|                                          | (180,400] | 444               | 162                           | 36.5%                             | <DL | 0.140  | 21.650 | 444               | 161                           | 36.3%                             | <DL | 0.0369 | 4.0400  |
| Distance to the nearest river (km)       | (0,5]     | 252               | 149                           | 59.1%                             | <DL | 0.532  | 13.310 | 252               | 156                           | 61.9%                             | <DL | 0.2050 | 10.4600 |
|                                          | (5,10]    | 199               | 116                           | 58.3%                             | <DL | 0.548  | 47.980 | 199               | 118                           | 59.3%                             | <DL | 0.2100 | 7.8400  |
|                                          | (10,40]   | 533               | 293                           | 55.0%                             | <DL | 0.400  | 48.930 | 533               | 316                           | 59.3%                             | <DL | 0.2100 | 6.3880  |
|                                          | (40,150]  | 348               | 139                           | 39.9%                             | <DL | 0.210  | 22.990 | 348               | 186                           | 53.4%                             | <DL | 0.1300 | 8.0150  |

|                     |                     | Fe (mg/L)         |                               |                                   |      |        |        | Mn (mg/L)         |                               |                                   |     |        |         |
|---------------------|---------------------|-------------------|-------------------------------|-----------------------------------|------|--------|--------|-------------------|-------------------------------|-----------------------------------|-----|--------|---------|
| Influencing factors |                     | Number of samples | Number of samples with Fe>0.3 | Percentage of samples with Fe>0.3 |      |        |        | Number of samples | Number of samples with Mn>0.1 | Percentage of samples with Mn>0.1 |     |        |         |
|                     |                     |                   |                               |                                   | Min  | Median | Max    |                   |                               |                                   | Min | Median | Max     |
| Soil type           | Dark-brown earths   | 14                | 4                             | 28.6%                             | <DL  | 0.120  | 1.902  | 14                | 6                             | 42.9%                             | <DL | 0.0670 | 1.0200  |
|                     | Black soils         | 263               | 145                           | 55.1%                             | <DL  | 0.408  | 48.760 | 263               | 153                           | 58.2%                             | <DL | 0.1833 | 10.4600 |
|                     | Chernozems          | 343               | 172                           | 50.1%                             | <DL  | 0.310  | 48.930 | 343               | 197                           | 57.4%                             | <DL | 0.1996 | 5.1730  |
|                     | Castanozems         | 19                | 10                            | 52.6%                             | <DL  | 0.315  | 7.257  | 19                | 11                            | 57.9%                             | <DL | 0.1500 | 0.4400  |
|                     | Aeolian sandy soils | 150               | 78                            | 52.0%                             | <DL  | 0.326  | 32.840 | 150               | 95                            | 63.3%                             | <DL | 0.1800 | 8.0150  |
|                     | Meadow soils        | 444               | 238                           | 53.6%                             | <DL  | 0.374  | 43.310 | 444               | 256                           | 57.7%                             | <DL | 0.1846 | 8.1130  |
|                     | Bog soils           | 24                | 13                            | 54.2%                             | <DL  | 0.532  | 16.920 | 24                | 13                            | 54.2%                             | <DL | 0.1256 | 0.5617  |
|                     | Solonchaks          | 11                | 5                             | 45.5%                             | <DL  | 0.280  | 11.850 | 11                | 7                             | 63.6%                             | <DL | 0.2100 | 0.7700  |
|                     | Solonetz            | 29                | 16                            | 55.2%                             | <DL  | 0.460  | 14.280 | 29                | 20                            | 69.0%                             | <DL | 0.1700 | 3.4100  |
|                     | Paddy soils         | 15                | 5                             | 33.3%                             | <DL  | 0.180  | 9.041  | 15                | 4                             | 26.7%                             | <DL | 0.0400 | 1.26400 |
| Soil texture        | Water body          | 16                | 9                             | 56.3%                             | <DL  | 0.870  | 47.980 | 16                | 11                            | 68.8%                             | <DL | 0.2100 | 7.8400  |
|                     | Sand                | 72                | 38                            | 52.8%                             | 0.01 | 0.325  | 16.490 | 72                | 46                            | 63.9%                             | <DL | 0.1800 | 8.0150  |
|                     | Loam                | 407               | 189                           | 46.4%                             | <DL  | 0.250  | 43.310 | 407               | 228                           | 56.0%                             | <DL | 0.1600 | 8.1130  |
|                     | Clay                | 849               | 467                           | 55.0%                             | <DL  | 0.410  | 48.930 | 849               | 500                           | 58.9%                             | <DL | 0.1960 | 10.460  |
| Land use type       | Paddy field         | 92                | 57                            | 62.0%                             | <DL  | 0.646  | 43.310 | 92                | 57                            | 62.0%                             | <DL | 0.3139 | 8.1130  |
|                     | Dryland             | 782               | 387                           | 49.5%                             | <DL  | 0.2778 | 48.930 | 782               | 436                           | 55.8%                             | <DL | 0.1600 | 10.4600 |
|                     | Forest land         | 37                | 17                            | 45.9%                             | <DL  | 0.259  | 48.760 | 37                | 19                            | 51.4%                             | <DL | 0.1400 | 1.3310  |
|                     | Grassland           | 113               | 52                            | 46.0%                             | <DL  | 0.266  | 11.330 | 113               | 64                            | 56.6%                             | <DL | 0.1715 | 6.3880  |

|                              |                   | Fe (mg/L)         |                               |                                   |     |        |        | Mn (mg/L)         |                               |                                   |     |        |         |
|------------------------------|-------------------|-------------------|-------------------------------|-----------------------------------|-----|--------|--------|-------------------|-------------------------------|-----------------------------------|-----|--------|---------|
| Influencing factors          |                   | Number of samples | Number of samples with Fe>0.3 | Percentage of samples with Fe>0.3 | Min | Median | Max    | Number of samples | Number of samples with Mn>0.1 | Percentage of samples with Mn>0.1 | Min | Median | Max     |
| Land use type                | Water body        | 73                | 43                            | 58.9%                             | <DL | 0.6700 | 47.980 | 73                | 47                            | 64.4%                             | <DL | 0.2384 | 7.8400  |
|                              | Construction land | 58                | 38                            | 65.5%                             | <DL | 0.455  | 18.160 | 58                | 35                            | 60.3%                             | <DL | 0.1500 | 2.6760  |
|                              | Unutilized land   | 175               | 102                           | 58.3%                             | <DL | 0.460  | 30.240 | 175               | 118                           | 67.4%                             | <DL | 0.2151 | 4.3990  |
| Groundwater type             | Fissure water     | 73                | 43                            | 58.9%                             | <DL | 0.710  | 41.700 | 73                | 35                            | 47.9%                             | <DL | 0.3368 | 48.9300 |
|                              | Pore water        | 1156              | 603                           | 52.2%                             | <DL | 0.337  | 48.930 | 1156              | 671                           | 58.0%                             | <DL | 0.1000 | 3.438   |
| Depth of groundwater level   | (0,5)             | 707               | 370                           | 52.3%                             | <DL | 0.340  | 47.980 | 707               | 400                           | 56.6%                             | <DL | 0.1710 | 10.4600 |
|                              | (5,10]            | 503               | 257                           | 51.1%                             | <DL | 0.320  | 48.930 | 503               | 302                           | 60.0%                             | <DL | 0.1900 | 8.1130  |
|                              | (10,20]           | 99                | 63                            | 63.6%                             | <DL | 0.510  | 48.760 | 99                | 63                            | 63.6%                             | <DL | 0.2800 | 4.3310  |
| COD <sub>Mn</sub>            | ≤1                | 475               | 156                           | 32.8%                             | <DL | 0.140  | 47.980 | 475               | 168                           | 35.4%                             | <DL | 0.0200 | 8.1130  |
|                              | 1-2               | 467               | 265                           | 56.7%                             | <DL | 0.441  | 37.120 | 467               | 317                           | 67.9%                             | <DL | 0.2853 | 6.3880  |
|                              | >2                | 390               | 276                           | 70.8%                             | <DL | 0.893  | 48.930 | 390               | 291                           | 74.6%                             | <DL | 0.3000 | 10.4600 |
| NH <sub>4</sub> <sup>+</sup> | ≤0.5              | 1082              | 472                           | 43.6%                             | <DL | 0.210  | 37.120 | 1082              | 542                           | 50.1%                             | <DL | 0.1011 | 10.4600 |
|                              | 0.5-1             | 130               | 114                           | 87.7%                             | <DL | 2.185  | 48.930 | 130               | 124                           | 95.4%                             | <DL | 0.7450 | 6.3880  |
|                              | >1                | 118               | 111                           | 94.1%                             | <DL | 3.222  | 48.760 | 118               | 110                           | 93.2%                             | <DL | 0.4750 | 8.1130  |
| NO <sub>3</sub> <sup>-</sup> | ≤1                | 393               | 302                           | 76.8%                             | <DL | 1.471  | 48.760 | 393               | 321                           | 81.7%                             | <DL | 0.4500 | 8.1130  |
|                              | 1-10              | 351               | 227                           | 64.7%                             | <DL | 0.576  | 48.930 | 351               | 255                           | 72.6%                             | <DL | 0.2900 | 7.8400  |
|                              | 10-50             | 213               | 68                            | 31.9%                             | <DL | 0.126  | 21.650 | 213               | 90                            | 42.3%                             | <DL | 0.0500 | 6.3880  |
|                              | >50               | 375               | 100                           | 26.7%                             | <DL | 0.120  | 18.540 | 375               | 110                           | 29.3%                             | <DL | 0.0268 | 10.4600 |

|                     |          | Fe (mg/L)         |                               |                                   |     |        |        | Mn (mg/L)         |                               |                                   |        |        |         |
|---------------------|----------|-------------------|-------------------------------|-----------------------------------|-----|--------|--------|-------------------|-------------------------------|-----------------------------------|--------|--------|---------|
| Influencing factors |          | Number of samples | Number of samples with Fe>0.3 | Percentage of samples with Fe>0.3 | Min | Median | Max    | Number of samples | Number of samples with Mn>0.1 | Percentage of samples with Mn>0.1 | Min    | Median | Max     |
| Total phosphorus    | ≤0.02    | 163               | 39                            | 23.9%                             | <DL | 0.086  | 32.840 | 163               | 64                            | 39.3%                             | <DL    | 0.0351 | 10.4600 |
|                     | 0.02-0.1 | 202               | 74                            | 36.6%                             | <DL | 0.137  | 36.020 | 202               | 73                            | 36.1%                             | <DL    | 0.0528 | 3.4930  |
|                     | 0.1-0.4  | 190               | 126                           | 66.3%                             | <DL | 0.637  | 48.760 | 190               | 129                           | 67.9%                             | <DL    | 0.2228 | 8.1130  |
|                     | >0.4     | 174               | 157                           | 90.2%                             | <DL | 3.062  | 41.700 | 174               | 155                           | 89.1%                             | 0.0086 | 0.7345 | 4.3990  |

DL: detection limit.

### Figure captions

**Figure S1.**  $\text{NH}_4^+$  concentrations, total phosphorus (TP) concentrations, and chemical oxygen demand ( $\text{COD}_{\text{Mn}}$ ) compared with the Fe and Mn concentrations in groundwater in areas with different land use types.

**Figure S2.** Overlay of the sampling points with high  $\text{NH}_4^+$  concentrations, total phosphorus (TP) concentrations, and chemical oxygen demand ( $\text{COD}_{\text{Mn}}$ ) in groundwater on a land use map.

**Figure S3.** Overlay of the sampling points with high  $\text{NH}_4^+$  concentrations, total phosphorus (TP) concentrations, and chemical oxygen demand ( $\text{COD}_{\text{Mn}}$ ) in groundwater on a map of the distributions of the Fe and Mn concentrations in groundwater.

**Figure S4.** Annual meteorological precipitation in 2015 in the study area.

**Figure S5.** Annual average meteorological temperature in 2015 in the study area.



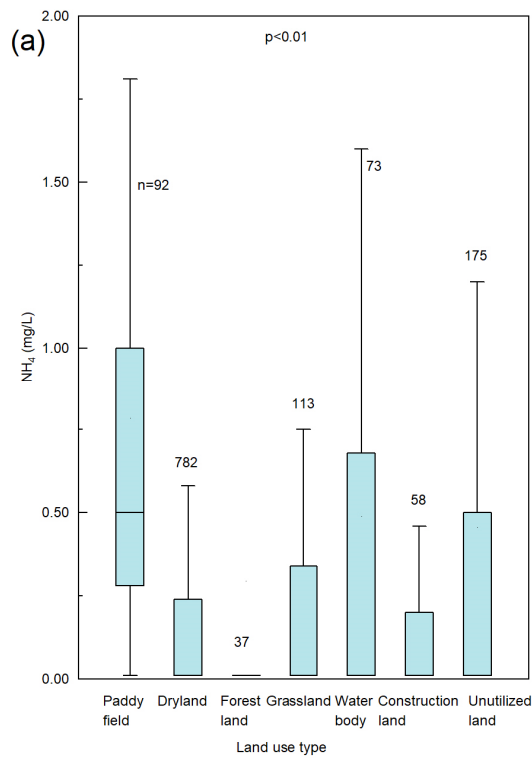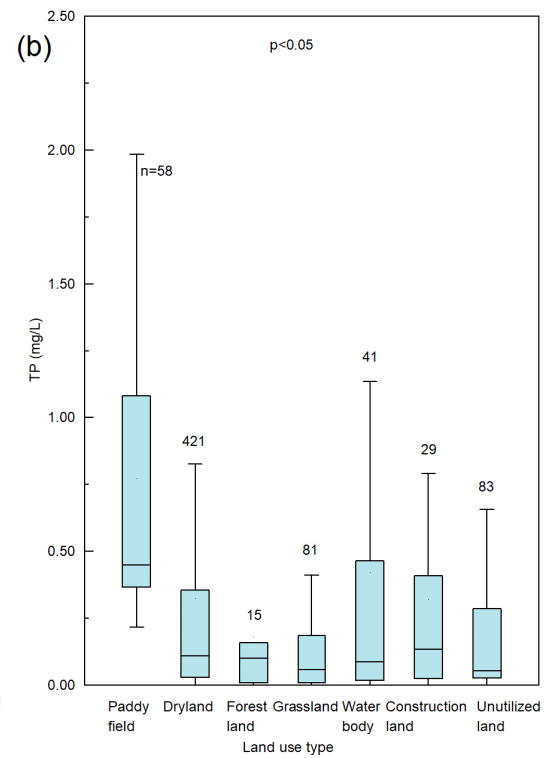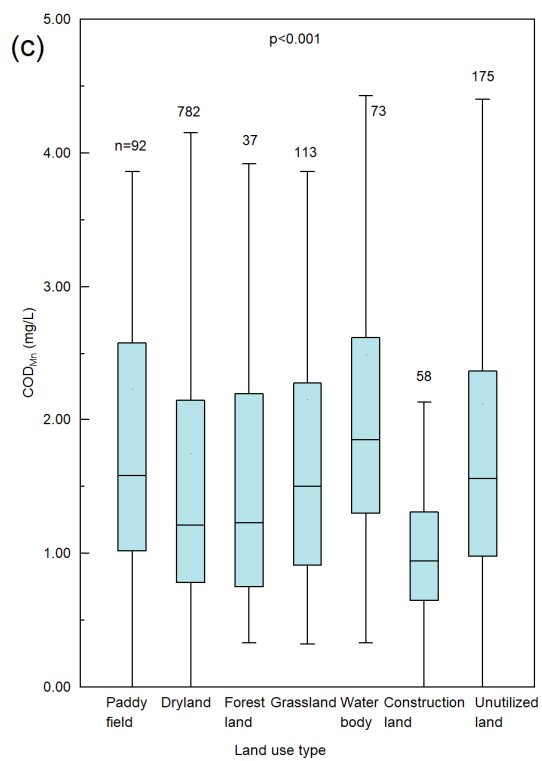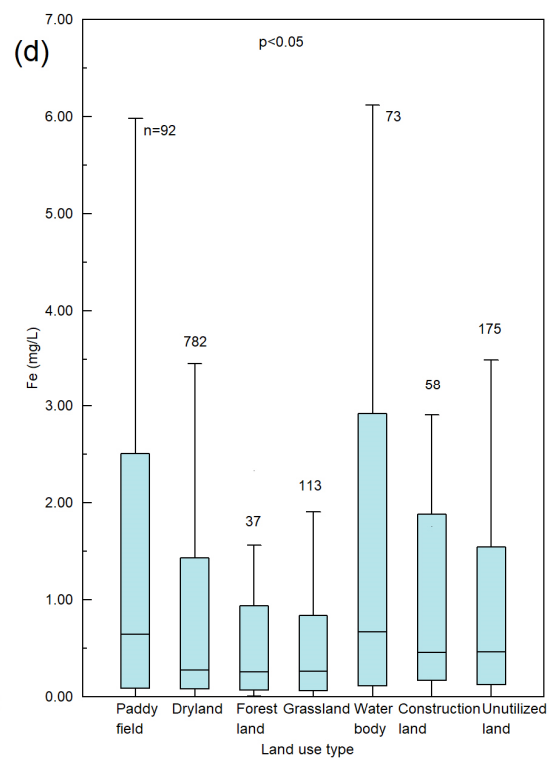

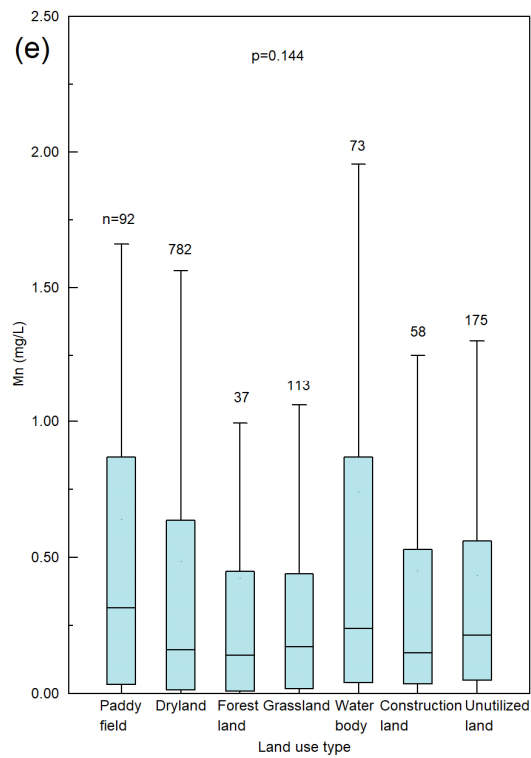

**Figure S1.**  $\text{NH}_4^+$  concentrations, total phosphorus (TP) concentrations, and chemical oxygen demand ( $\text{COD}_{\text{Mn}}$ ) compared with the Fe and Mn concentrations in groundwater in areas with different land use types.

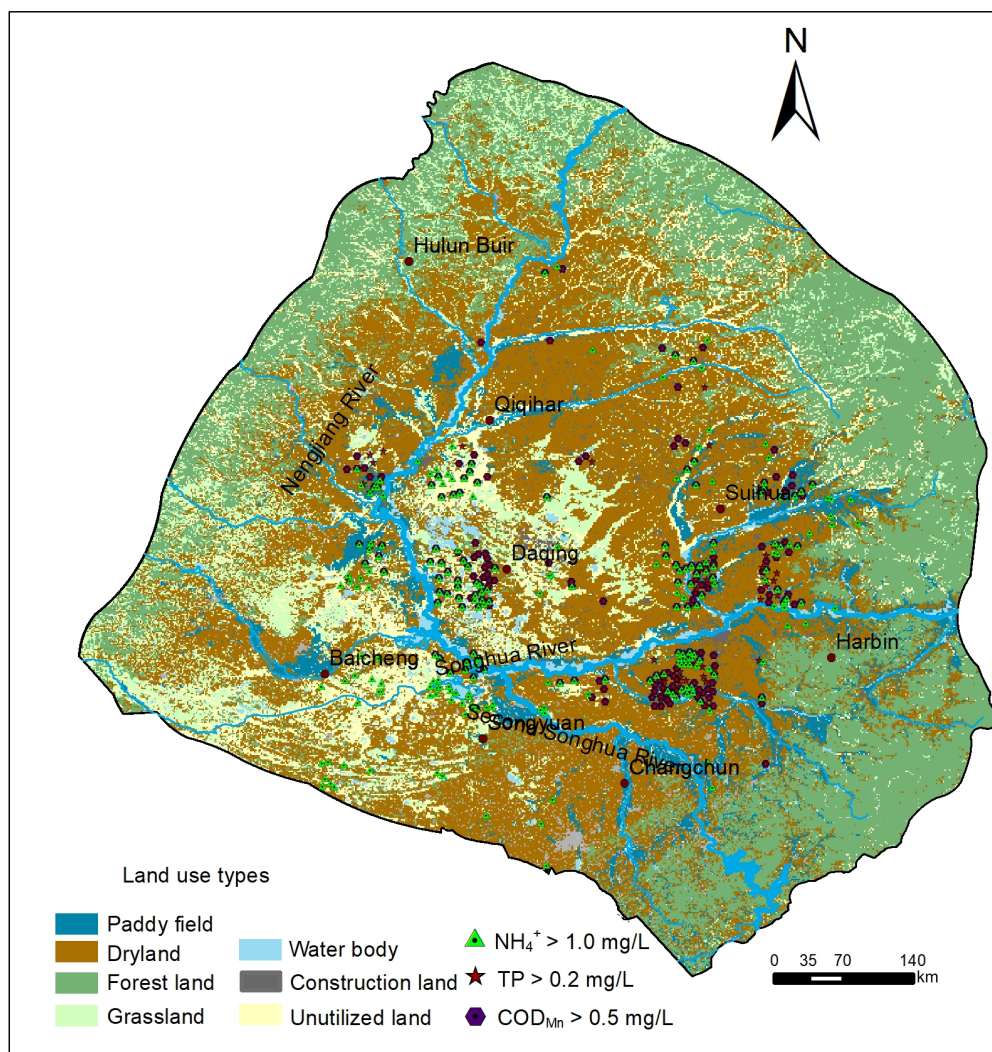

**Figure S2.** Overlay of the sampling points with high  $\text{NH}_4^+$  concentrations, total phosphorus (TP) concentrations, and chemical oxygen demand ( $\text{COD}_{\text{Mn}}$ ) in groundwater on a land use map.

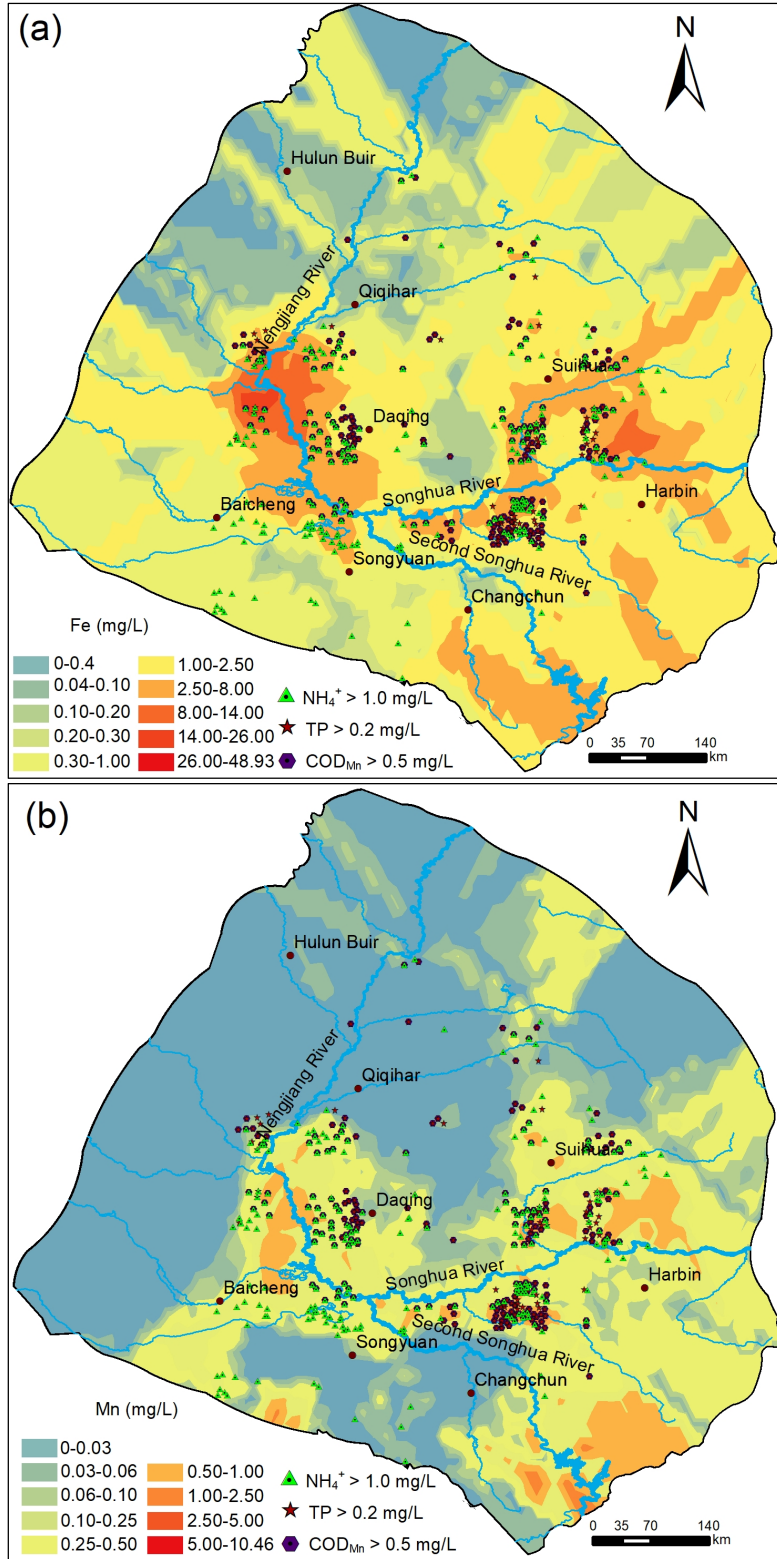

**Figure S3.** Overlay of the sampling points with high  $\text{NH}_4^+$  concentrations, total phosphorus (TP) concentrations, and chemical oxygen demand ( $\text{COD}_{\text{Mn}}$ ) in groundwater on a map of the distributions of the Fe and Mn concentrations in groundwater.

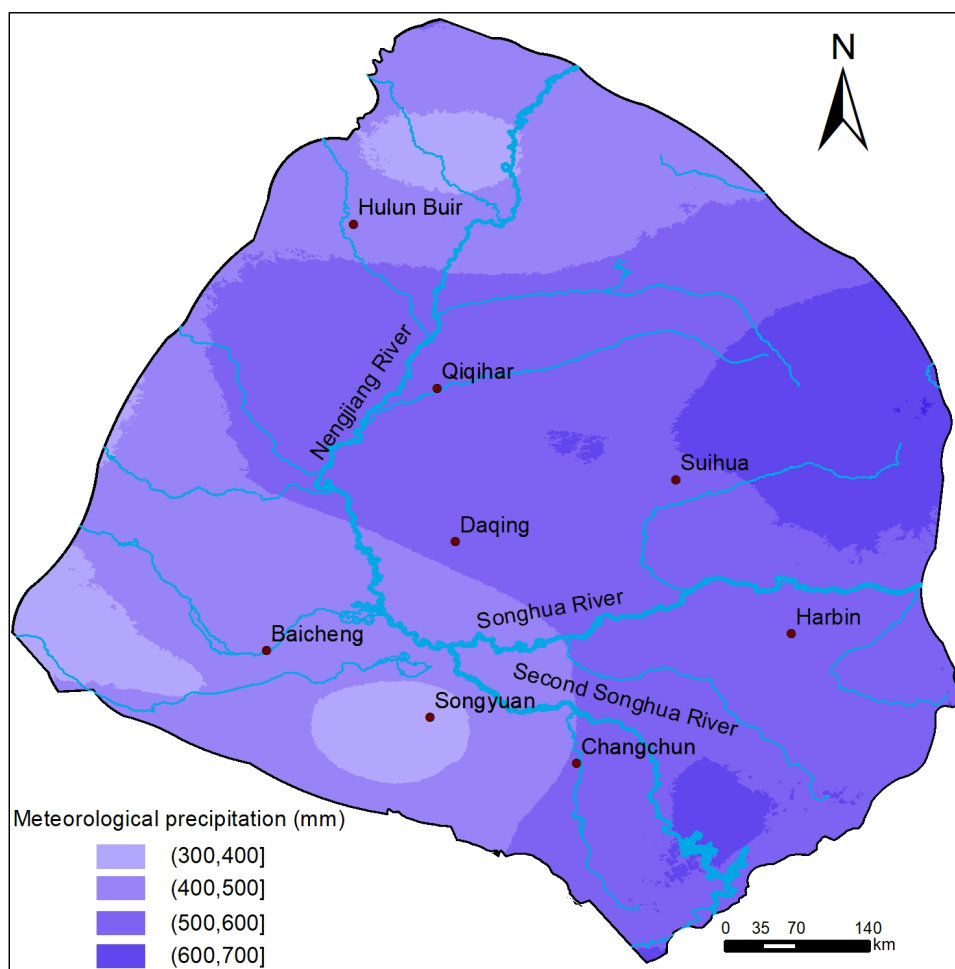

**Figure S4.** Annual meteorological precipitation in 2015 in the study area.

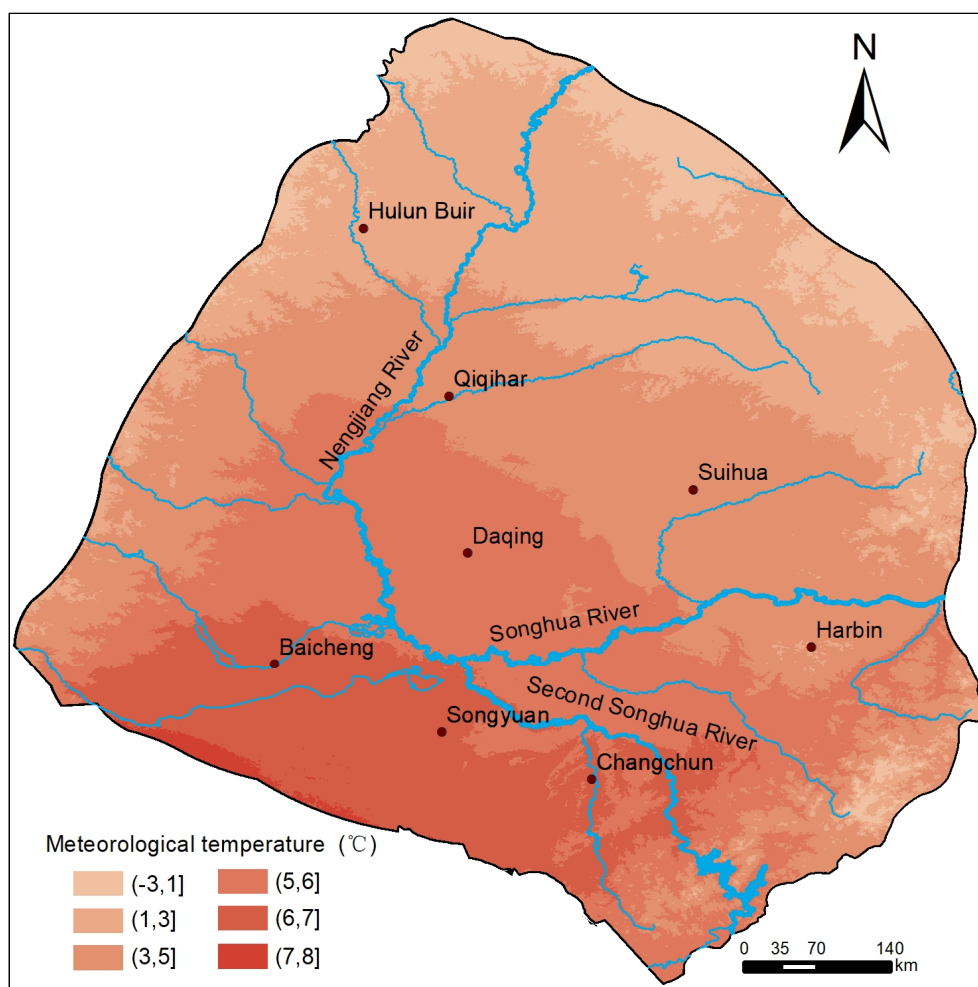

**Figure S5.** Annual average meteorological temperature in 2015 in the study area.
